# Supplementary material
Source: HighWire-hosted journal article supplement (http://www.jrheum.org/highwire/filestream/29738/field_highwire_adjunct_files/0/150057DataSuppl.pdf)
Supplement: 150057DataSuppl.pdf [file 150057DataSuppl.pdf]

**ONLINE SUPPLEMENTARY DATA**

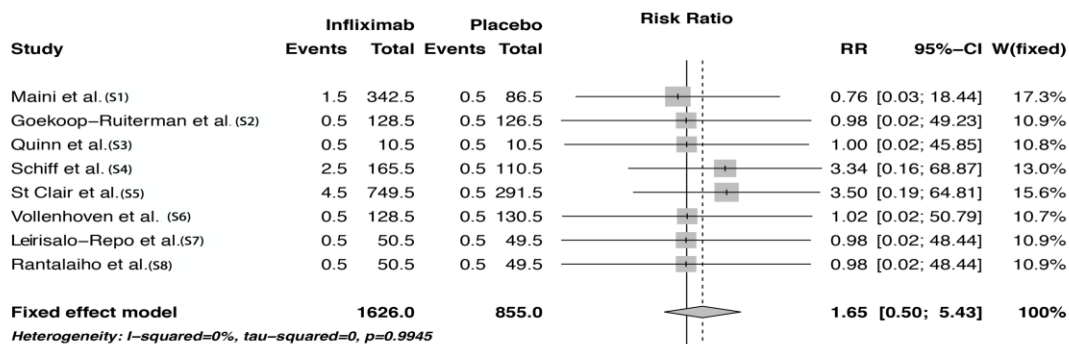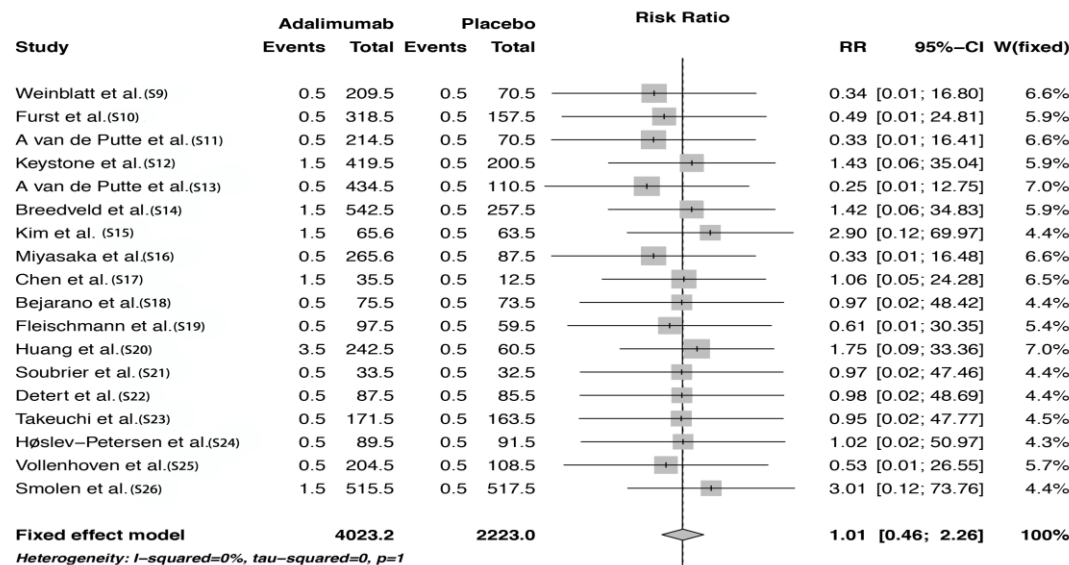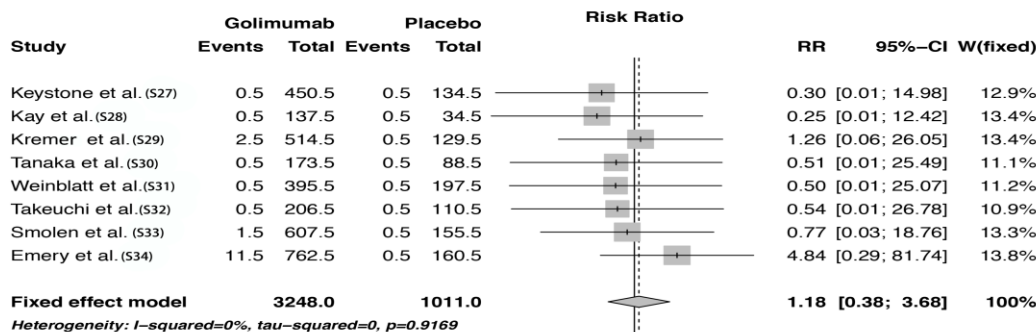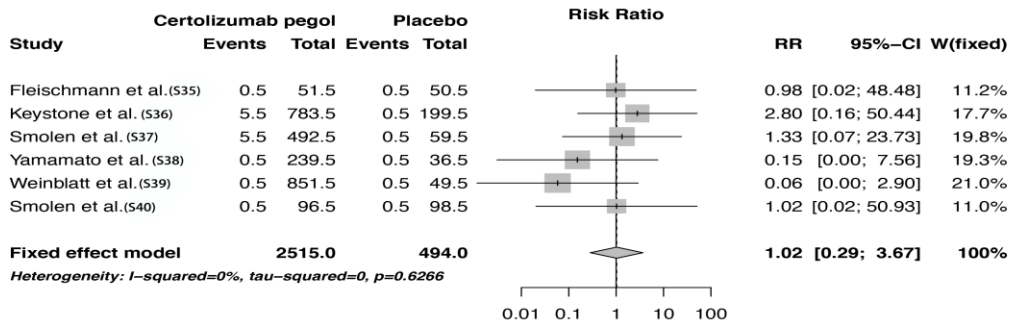

Supplementary Figure 1. Forest plot of the TB risk ratio of each TNF antagonist vs the control in RCTs.

Online supplement to: The Risk of Tuberculosis in Patients with Rheumatoid Arthritis Treated with Tumor Necrosis Factor- $\alpha$  Antagonist: A Metaanalysis of Both Randomized Controlled Trials and Registry/Cohort Studies. *The Journal of Rheumatology*. doi:10.3899/jrheum.150057

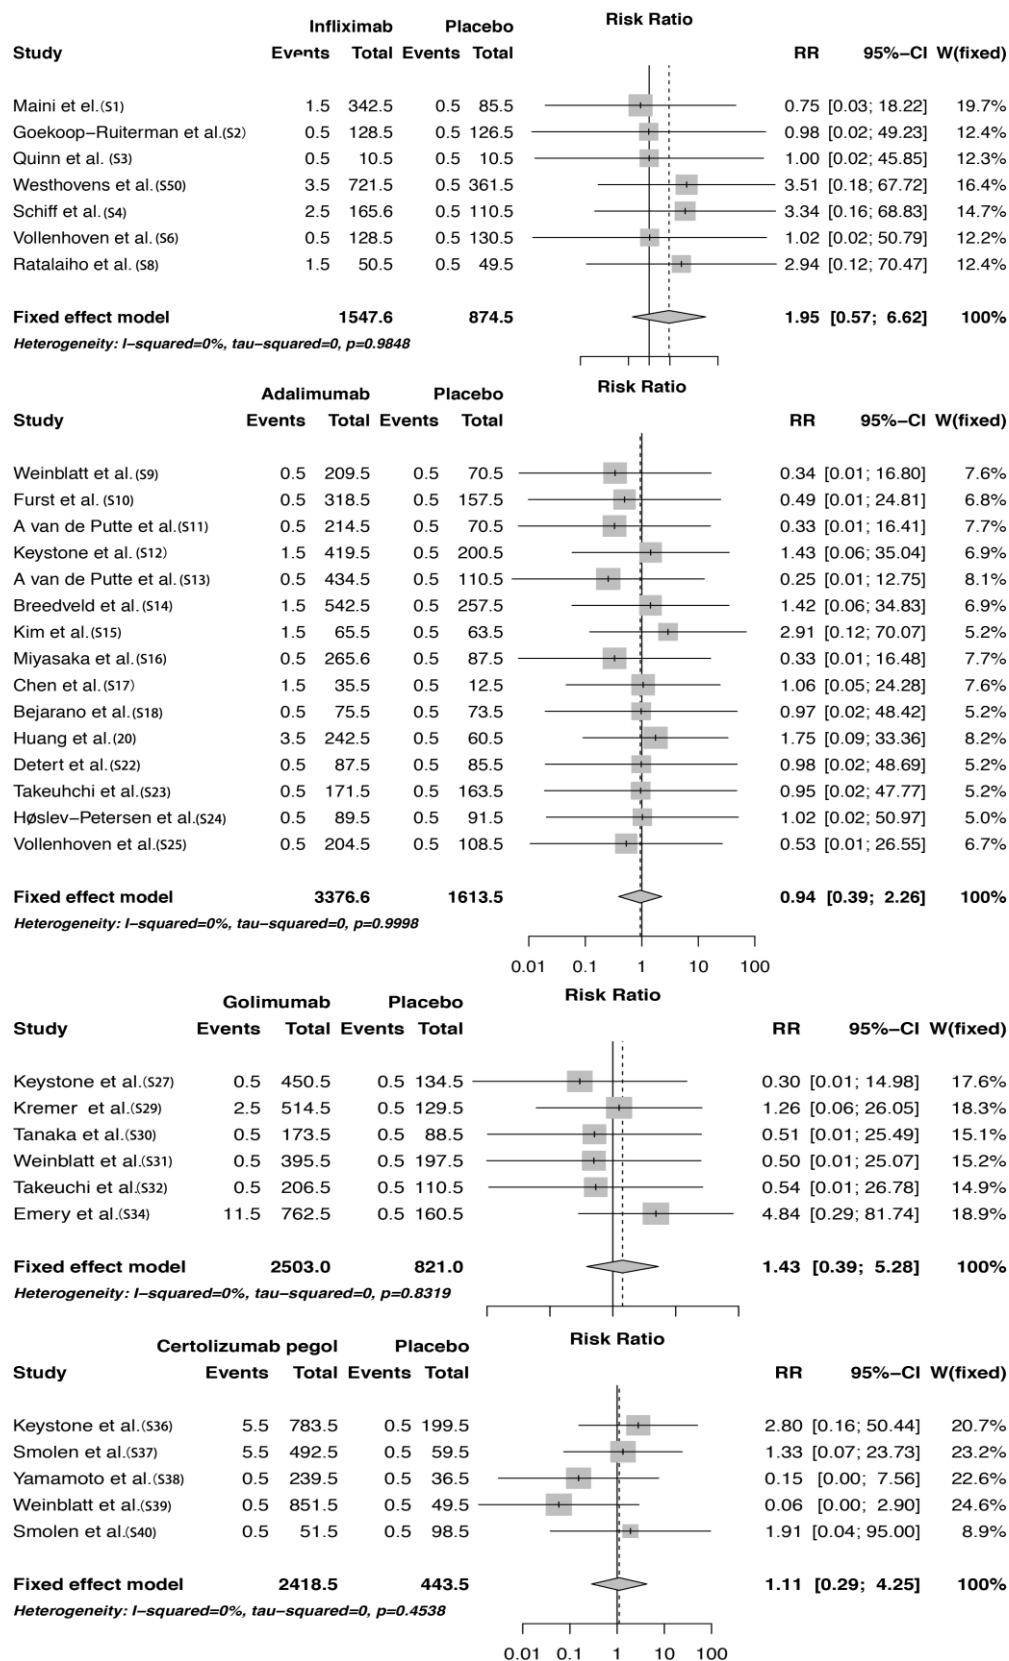

Supplementary Figure 2. Forest plot of TB risk ratio of each TNF antagonist versus placebo in RCTs, excluding the possibly biased articles.

Online supplement to: The Risk of Tuberculosis in Patients with Rheumatoid Arthritis Treated with Tumor Necrosis Factor- $\alpha$  Antagonist: A Metaanalysis of Both Randomized Controlled Trials and Registry/Cohort Studies. *The Journal of Rheumatology*. doi:10.3899/jrheum.150057

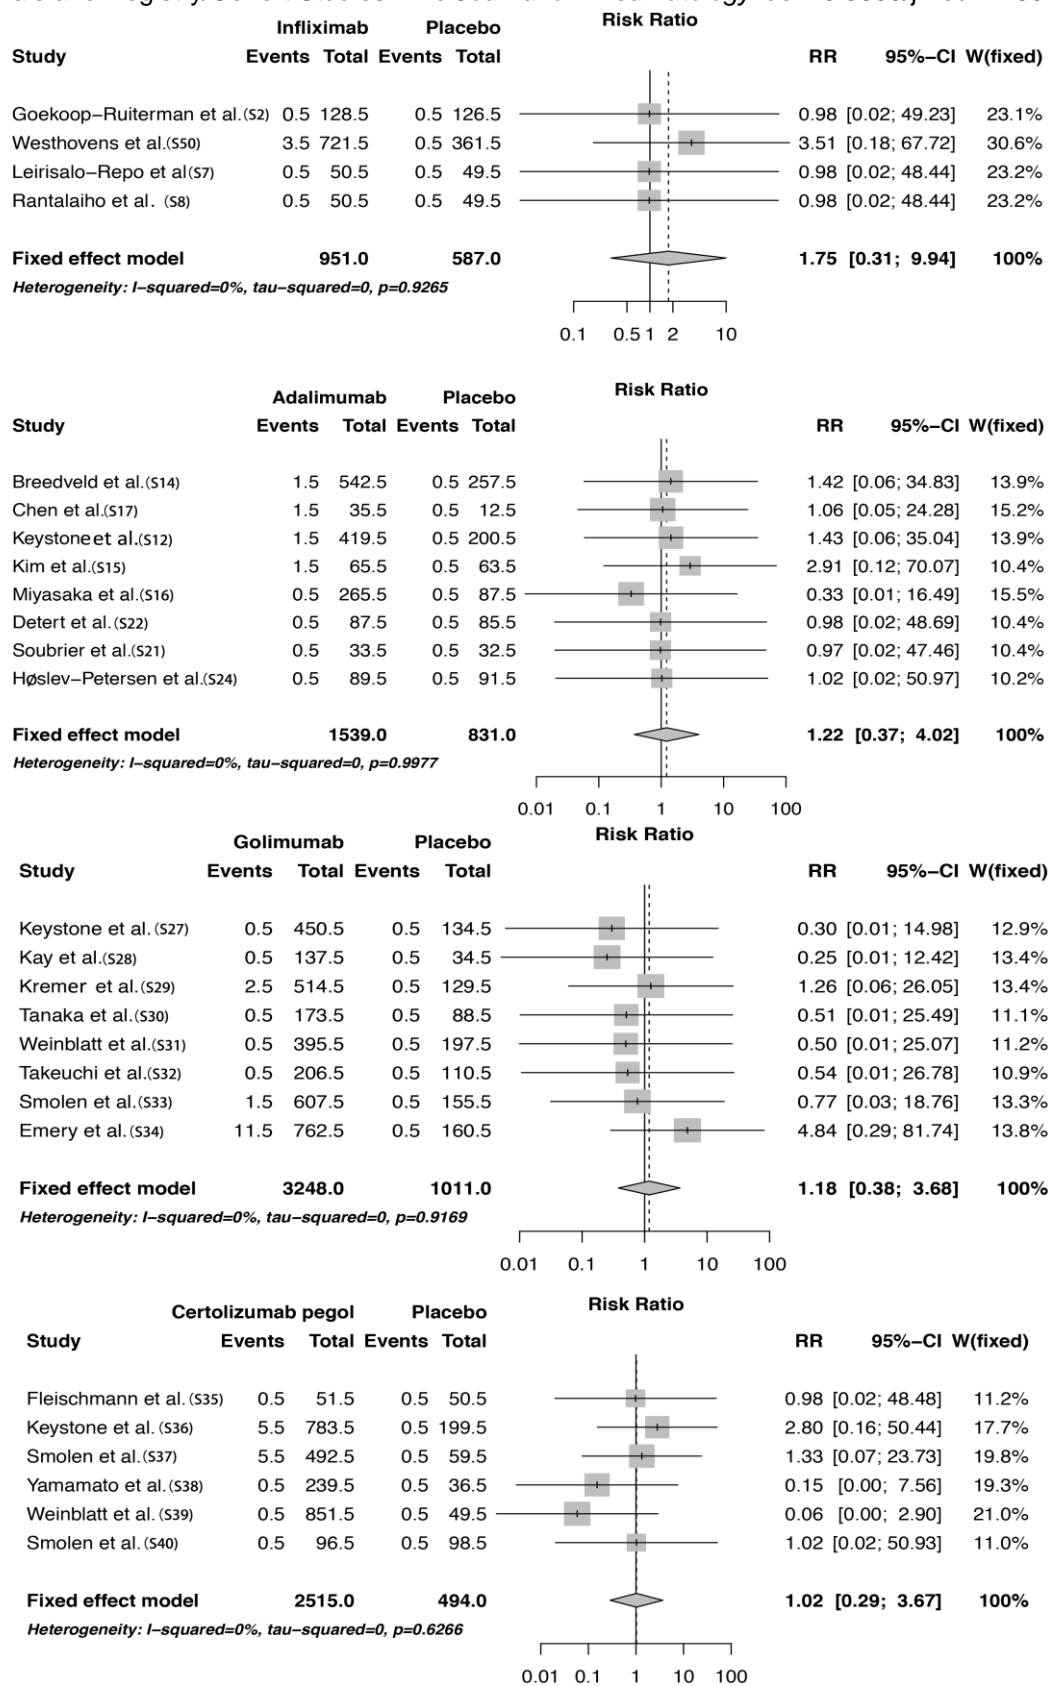

Supplementary Figure 3. Forest plot of the TB risk ratio of each TNF antagonist versus the control in RCTs, excluding studies without latent tuberculosis screening and prophylaxis.

Online supplement to: The Risk of Tuberculosis in Patients with Rheumatoid Arthritis Treated with Tumor Necrosis Factor- $\alpha$  Antagonist: A Metaanalysis of Both Randomized Controlled Trials and Registry/Cohort Studies. *The Journal of Rheumatology*. doi:10.3899/jrheum.150057

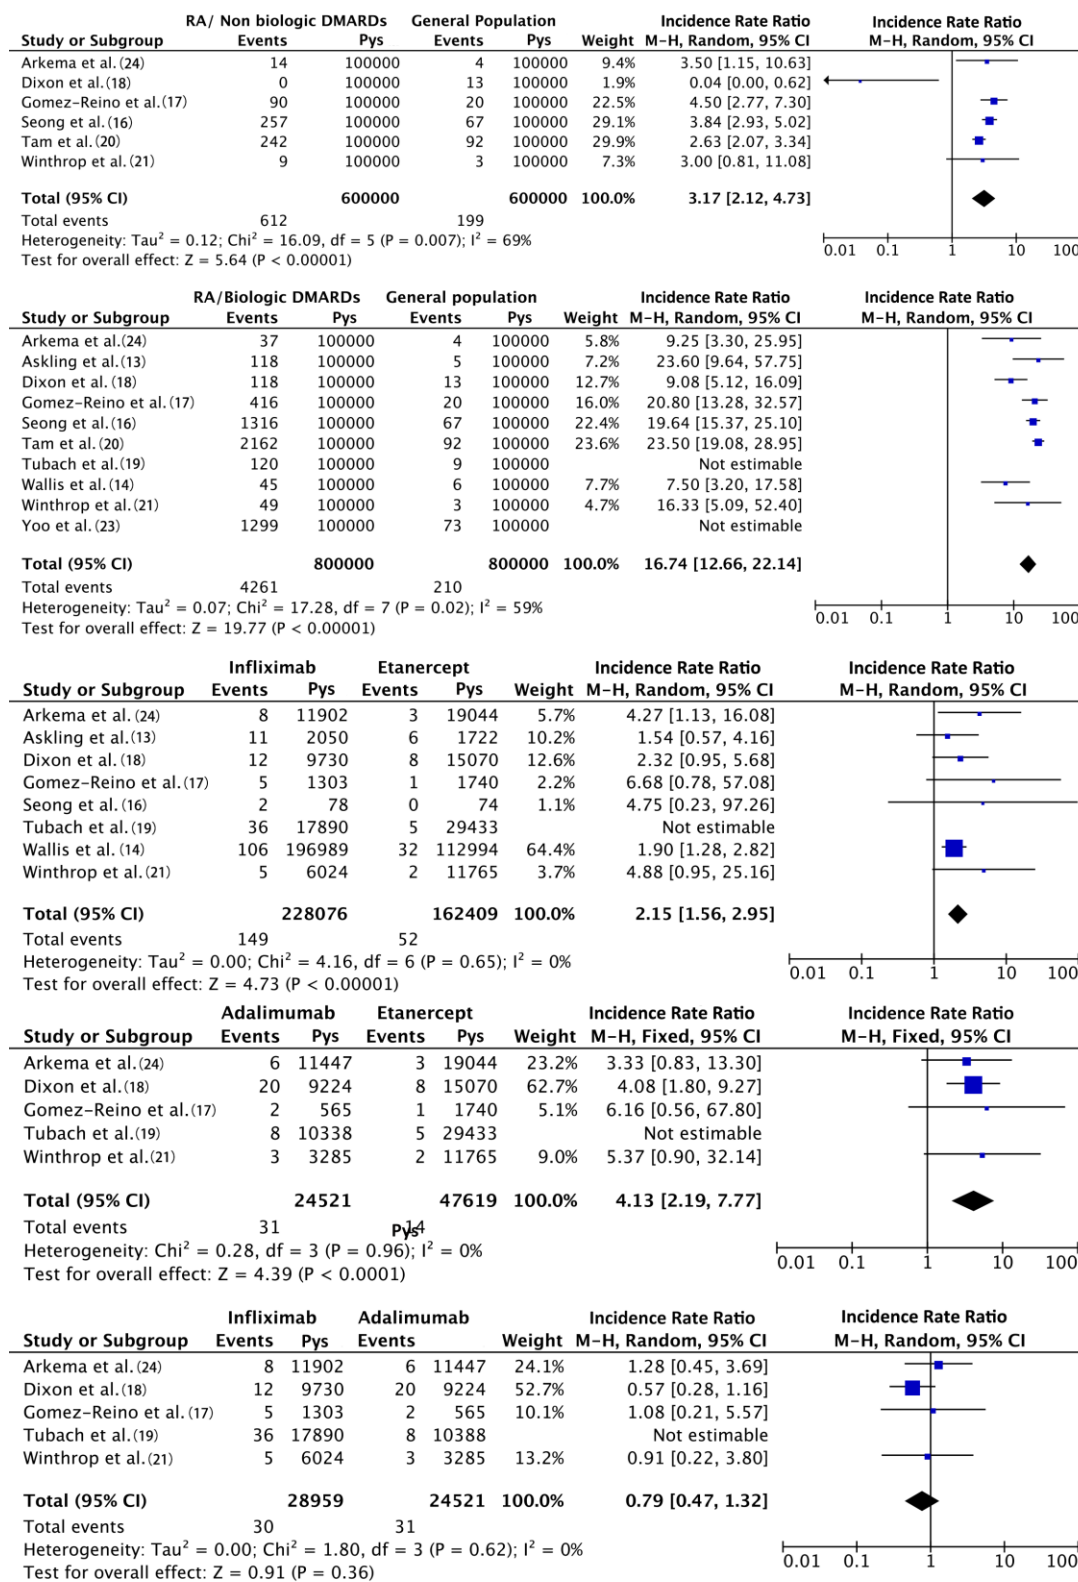

Supplementary Figure 4. Forest plot of the TB risk ratio of 1) RA/Non biologic DMARDs vs. General population; 2) RA/Biologic DMARDs vs. General population; 3) Infliximab vs. Etanercept; 4) Adalimumab vs. Etanercept; 5) Infliximab vs. Adalimumab, excluding the 3 articles with diseases other than RA. RA: rheumatoid arthritis; Pys: patient years; DMARDs: disease modifying anti-rheumatic drugs.

*Supplementary Table 1.* Check list for quality assessment and scoring of nonrandomized studies

| Check list                                                                                                                                                                                                                    |
|-------------------------------------------------------------------------------------------------------------------------------------------------------------------------------------------------------------------------------|
| Selection                                                                                                                                                                                                                     |
| 1. Assignment for TNF-alpha antagonists treatment: (if reported, one star)                                                                                                                                                    |
| 2. The exposed cohorts were representative in comparison with the general RA population: (if yes, one star)                                                                                                                   |
| 3. PPD test done at the start of the study : (if yes, one star)                                                                                                                                                               |
| Comparability                                                                                                                                                                                                                 |
| 4. Group comparable for 1,2,3 (if yes, two stars, one star was assigned if one group differed or was not reported, no star was assigned if two group differed)                                                                |
| 5. Group comparable for 4,5 (5 is only compared among TNF alpha antagonists exposed cohorts) (if yes, two stars, one star was assigned if one group differed or was not reported, no star was assigned if two group differed) |
| Outcome assessment                                                                                                                                                                                                            |
| 6. Clearly defined TB cases: (if yes, one star)                                                                                                                                                                               |
| 7. Adequacy of follow-up: (if follow up > 90%, one star)                                                                                                                                                                      |
| Comparability variables: 1=age; 2=gender; 3=Diabetes; 4=PPD test positivity; 5=Prophylaxis.                                                                                                                                   |

*Supplementary Table 2.* Characteristics of the randomized controlled trials

| Author               | Intervention (Placebo) | patient | TB case | Follow up(wks) |
|----------------------|------------------------|---------|---------|----------------|
| Weinblatt (S9)       | ADA 20mg(eow)+MTX      | 69      | 0       | 24             |
|                      | ADA 40mg(eow)+MTX      | 67      |         |                |
|                      | ADA 80mg(eow)+MTX      | 73      |         |                |
|                      | Pla+MTX                | 70      |         |                |
| Furst (S10)          | ADA 40mg(eow)          | 318     | 0       | 24             |
|                      | Pla                    | 157     |         |                |
| A van de Putte (S11) | ADA 20mg(qw)           | 72      | 0       | 12             |
|                      | ADA 40mg(qw)           | 70      |         |                |
|                      | ADA 80mg(qw)           | 72      |         |                |
|                      | Pla                    | 70      |         |                |
| Keystone (S12)       | ADA 20mg(qw)+MTX       | 212     | 0       | 52             |
|                      | ADA 40mg(eow)+MTX      | 207     | 1       |                |
|                      | Pla+MTX                | 200     | 0       |                |
| A van de Putte (S13) | ADA 20mg(eow)          | 106     | 0       | 26             |
|                      | ADA 40mg(eow)          | 113     |         |                |
|                      | ADA 20mg(qw)           | 112     |         |                |
|                      | ADA 40mg(qw)           | 103     |         |                |
|                      | Pla                    | 110     |         |                |
| Breedveld (S14)      | ADA 40mg(eow)          | 274     | 0       | 104            |
|                      | ADA 40mg(eow)+MTX      | 268     | 1       |                |
|                      | Pla+MTX                | 257     | 0       |                |

Online supplement to: The Risk of Tuberculosis in Patients with Rheumatoid Arthritis Treated with Tumor Necrosis Factor- $\alpha$  Antagonist: A Metaanalysis of Both Randomized Controlled Trials and Registry/Cohort Studies. *The Journal of Rheumatology*. doi:10.3899/jrheum.150057

|                        |                           |     |   |     |
|------------------------|---------------------------|-----|---|-----|
| Kim.(S15)              | ADA 40mg(eow)+MTX         | 65  | 1 | 24  |
|                        | Pla+MTX                   | 63  | 0 |     |
| Miyasaka (S16)         | ADA 20mg(eow)             | 87  | 0 | 24  |
|                        | ADA 40mg(eow)             | 91  |   |     |
|                        | ADA 80mg(eow)             | 87  |   |     |
|                        | Pla                       | 87  |   |     |
| Chen (S17)             | ADA 40mg(eow)+MTX         | 35  | 1 | 23  |
|                        | Pla+MTX                   | 12  | 0 |     |
| Bejarano (S18)         | ADA(eow)+MTX              | 75  | 0 | 56  |
|                        | Pla+MTX                   | 73  |   |     |
| Fleischmann (S19)      | ADA 40mg(eow)+tofacitinib | 97  | 0 | 24  |
|                        | Pla                       | 59  |   |     |
| Huang (S20)            | ADA 40mg(eow)+MTX         | 121 | 3 | 24  |
|                        | ADA 80 mg(eow)+MTX        | 121 |   |     |
|                        | Pla+MTX                   | 60  |   |     |
| Soubrier (S21)         | ADA 40mg(eow)+MTX         | 33  | 0 | 52  |
|                        | MTX                       | 32  |   |     |
| Detert (S22)           | ADA 40mg(eow)+MTX         | 87  | 0 | 48  |
|                        | Pla+MTX                   | 85  |   |     |
| Takeuchi (S23)         | ADA 40mg(eow)+MTX         | 171 | 0 | 26  |
|                        | MTX                       | 163 |   |     |
| Høstlev-Petersen (S24) | ADA 40mg(eow)+MTX         | 89  | 0 | 52  |
|                        | Pla+MTX                   | 91  |   |     |
| Vollenhoven (S25)      | ADA 40mg(eow)+MTX         | 204 | 0 | 26  |
|                        | Pla+MTX                   | 108 |   |     |
| Smolen(S26)            | ADA 40mg(eow)+MTX         | 515 | 1 | 78  |
|                        | Pla+MTX                   | 517 | 0 |     |
| Moreland (S47)         | ETA 10mg(biw)             | 76  | 0 | 26  |
|                        | ETA 25mg(biw)             | 78  |   |     |
|                        | Pla                       | 80  |   |     |
| Genovese (S43)         | ETA 10mg(biw)             | 166 | 0 | 104 |
|                        | ETA 25mg(biw)             | 177 |   |     |
|                        | MTX                       | 169 |   |     |
| Keystone (S49)         | ETA 25mg(biw)             | 153 | 0 | 16  |
|                        | ETA 50mg(qw)              | 214 |   |     |
|                        | Pla                       | 53  |   |     |
| Van der Heijide (S48)  | ETA 25mg(biw)             | 223 | 0 | 104 |
|                        | ETA 25mg(biw)+MTX         | 231 |   |     |
|                        | Pla+MTX                   | 228 |   |     |
| Combe (S41)            | ETA 25mg(biw)             | 103 | 0 | 24  |

Online supplement to: The Risk of Tuberculosis in Patients with Rheumatoid Arthritis Treated with Tumor Necrosis Factor- $\alpha$  Antagonist: A Metaanalysis of Both Randomized Controlled Trials and Registry/Cohort Studies. *The Journal of Rheumatology*. doi:10.3899/jrheum.150057

|                         |                             |     |   |     |
|-------------------------|-----------------------------|-----|---|-----|
|                         | ETA 25mg(biw)+Sulfasalazine | 101 |   |     |
|                         | Pla+Sulfasalazine           | 50  |   |     |
| Emery (S42)             | ETA 50mg(qw)+MTX            | 274 | 0 | 52  |
|                         | Pla+MTX                     | 268 |   |     |
| Kim (S45)               | ETA 25mg(biw)+MTX           | 197 | 0 | 16  |
|                         | DMARD+MTX                   | 103 |   |     |
| Moreland (S47)          | ETA 50mg(qw)+MTX            | 244 | 0 | 104 |
|                         | MTX+Sulfasalazine           | 132 |   |     |
| Iannone (S44)           | ETA 50mg(qw)                | 13  |   |     |
|                         | ETA 50mg(qw)+MTX            | 7   | 0 | 54  |
|                         | MTX                         | 9   |   |     |
| Maini (S1)              | INF 3mg/kg(q4w)             | 86  | 1 |     |
|                         | INF 3mg/kg(q8w)             | 89  | 0 |     |
|                         | INF 10mg/kg(q4w)            | 80  | 0 | 30  |
|                         | INF 10mg/kg(q8w)            | 87  | 0 |     |
|                         | Pla                         | 86  | 0 |     |
| Goekoop-Ruijterman (S2) | INF 3mg/kg(q8w)+DMARDs      | 128 | 0 | 52  |
|                         | DMARDs                      | 126 |   |     |
| St.Clair (S5)           | INF 3mg/kg(q8w)             | 372 | 3 |     |
|                         | INF 6mg/kg(q8w)             | 377 | 1 | 54  |
|                         | Pla+MTX                     | 291 | 0 |     |
| Quinn (S3)              | INF 3mg/kg(q8w)+MTX         | 10  | 0 | 54  |
|                         | PLa+MTX                     | 10  |   |     |
| Westhovens (S50)        | INF 3mg/kg(q8w)+MTX         | 360 | 0 |     |
|                         | INF 10mg/kg(q8w)+MTX        | 361 | 3 | 22  |
|                         | Pla+MTX                     | 361 | 0 |     |
| Schiff (S4)             | INF 3mg/kg(q8w)+MTX         | 165 | 2 | 26  |
|                         | Pla+MTX                     | 110 | 0 |     |
| Vollenhoven (S6)        | INF 3mg/kg(q8w)+MTX         | 128 | 0 | 54  |
|                         | Sulfasalazine+MTX           | 130 |   |     |
| Leirisalo-Repo (S7)     | INF 3mg/kg(q8w)+FIN-RACo    | 50  | 0 | 104 |
|                         | Pla+FIN-RACo                | 49  |   |     |
| Rantalaiho (S8)         | INF 3mg/kg+FIN-RACo         | 50  | 0 | 260 |
|                         | Pla+FIN-RACo                | 49  |   |     |
| Kay (S28)               | GOL 50mg(q4w)+MTX           | 37  |   |     |
|                         | GOL 50mg(q2w)+MTX           | 32  |   |     |
|                         | GOL 100mg(q4w)+MTX          | 33  | 0 | 52  |
|                         | GOL 100mg(q2w)+MTX          | 35  |   |     |
|                         | Pla+MTX                     | 34  |   |     |

Online supplement to: The Risk of Tuberculosis in Patients with Rheumatoid Arthritis Treated with Tumor Necrosis Factor- $\alpha$  Antagonist: A Metaanalysis of Both Randomized Controlled Trials and Registry/Cohort Studies. *The Journal of Rheumatology*. doi:10.3899/jrheum.150057

|                   |                          |     |   |     |
|-------------------|--------------------------|-----|---|-----|
| Keystone (S27)    | GOL 50mg(q4w)+MTX        | 212 | 0 | 24  |
|                   | GOL 100mg(q4w)+MTX       | 105 |   |     |
|                   | GOL 100mg(q4w)+Pla       | 133 |   |     |
|                   | Pla+MTX                  | 134 |   |     |
| Kremer (S29)      | GOL 2mg/kg(q12w)         | 257 | 0 | 48  |
|                   | GOL 4mg/kg(q12w))        | 257 | 2 |     |
|                   | Pla+MTX                  | 129 |   |     |
| Tanaka (S30)      | GOL 50mg(q4w)+MTX        | 86  | 0 | 24  |
|                   | GOL 100mg(q4w)+MTX       | 87  |   |     |
|                   | Pla+MTX                  | 88  |   |     |
| Weinblatt (S31)   | GOL 2mg/kg(q8w)+MTX      | 395 | 0 | 24  |
|                   | Pla+MTX                  | 197 |   |     |
| Takeuchi (S32)    | GOL 50mg(q4w)            | 102 | 0 | 16  |
|                   | GOL 100mg(q4w)           | 104 |   |     |
|                   | Pla                      | 110 |   |     |
| Smolen (S33)      | GOL 50mg(q4w)            | 279 | 0 | 160 |
|                   | GOL 100mg(q4w)           | 328 | 1 |     |
|                   | Pla                      | 155 |   |     |
| Emery (S34)       | GOL 50mg(q4w)+MTX        | 293 | 4 | 104 |
|                   | GOL 100mg(q4w)+MTX       | 312 | 5 |     |
|                   | GOL 100mg(q4w)+Pla       | 157 | 2 |     |
|                   | Pla+MTX                  | 160 |   |     |
| Keystone (S36)    | CIMZIA 200mg(q2w)+MTX    | 392 | 2 | 52  |
|                   | CIMZIA 400mg(q2w)+MTX    | 389 | 3 |     |
|                   | Pla+MTX                  | 199 |   |     |
| Smolen (S37)      | CIMZIA 200mg(q2w)+MTX    | 248 | 3 | 24  |
|                   | CIMZIA 400mg(q2w)+MTX    | 246 | 2 |     |
|                   | Pla+MTX                  | 125 |   |     |
| Fleischmann (S35) | CIMZIA 400mg(q4w)+MTX    | 111 | 0 | 24  |
|                   | Pla+MTX                  | 109 |   |     |
| Weinblatt (S39)   | CIMZIA 200mg(q2w)        | 846 | 0 | 12  |
|                   | Pla                      | 209 |   |     |
| Yamamoto (S38)    | CIMZIA 100mg(q2w)+MTX    | 72  | 0 | 24  |
|                   | CIMZIA 200mg(q2w)+MTX    | 82  |   |     |
|                   | CIMZIA 400mg(q2w)+MTX    | 85  |   |     |
|                   | Pla+MTX                  | 77  |   |     |
| Smolen (S40)      | CIMZIA 200mg(q2w)+DMARDs | 96  | 0 | 52  |
|                   | Pla+DMARDs               | 98  |   |     |

TB: tuberculosis; INF: infliximab; ADA: adalimumab; ETA: etanercept; GOL: golimumab; CIMZIA: certolizumab pegol; Pla: placebo; MTX: methotrexate; wks: weeks.



Supplementary Table 3. Characteristics of the registry and cohort studies

| Author                  | Country     | Local TB IR (per 100000 pys) | TB IR of RA/Non biologic DMARDs (per 100000pys) | TB IR of RA/biologic DMARDs (per 100000pys) |        |       |       |
|-------------------------|-------------|------------------------------|-------------------------------------------------|---------------------------------------------|--------|-------|-------|
|                         |             |                              |                                                 | Total                                       | INF    | ADA   | ETA   |
| Asking et al. (24)      | Sweden      | 5                            | 18.5                                            | 118                                         | 145    | N     | 80    |
| Wallis et al. (14)      | USA         | 5.6                          | N                                               | 44.5                                        | 53.8   | N     | 28.3  |
| Sichletidis et al. (15) | Greece      | 19                           | N                                               | 449                                         | N      | N     | N     |
| Seong et al. (16)       | South Korea | 67.2                         | 257.4                                           | 2558                                        | 2558   | N     | 0     |
| Gomez-Reino et al. (17) | Spain       | 20                           | 90                                              | 172                                         | 383    | 176   | 114   |
| Favalli et al. (25)     | Italy       | N                            | N                                               | 126.6                                       | 258.6  | 112.9 | 38.79 |
| Dixon et al. (18)       | Britain     | 12.3                         | 0                                               | 118                                         | 123    | 217   | 53    |
| Tubach et al. (19)      | France      | 8.7                          | N                                               | 119.6                                       | 187.5  | 215   | 9.3   |
| Tam et al. (20)         | Hong Kong   | 91.8                         | 241.8                                           | 2162                                        | N      | N     | N     |
| Winthrop et al. (21)    | USA         | 2.8                          | 8.7                                             | 49                                          | 83     | 91    | 17    |
| Atzni et al. (22)       | Italy       | N                            | N                                               | 126.6                                       | 258.6  | 112.9 | 38.8  |
| Yoo et al. (23)         | South Korea | 72.6                         | N                                               | 1298.7                                      | 4109.6 | 0     | N     |
| Arkema et al. (24)      | Sweden      | 3.5                          | 14.3                                            | 39.4                                        | 67.2   | 52.4  | 15.7  |

IR: incidence rate; pys: person years; TB: tuberculosis; RA: rheumatoid arthritis; DMARDs: disease modifying anti-rheumatic drugs; N=data not available.

*Supplementary Table 4.* The evaluation of bias for randomized controlled trials

| Study                  | Sequence Generation | Allocation Concealment | Blinding of participant and personnel | of and Data | Incomplete Outcome | Blinding of outcome assessment | Selective outcome reporting | Other sources of bias* |
|------------------------|---------------------|------------------------|---------------------------------------|-------------|--------------------|--------------------------------|-----------------------------|------------------------|
| <b>Adalimumab</b>      |                     |                        |                                       |             |                    |                                |                             |                        |
| Weinblatt (S9)         | Unclear             | Unclear                | Low                                   |             | Low                | Unclear                        | Low                         | Low                    |
| Furst (S10)            | Unclear             | Unclear                | Low                                   |             | Low                | Unclear                        | Low                         | Low                    |
| A van de Putte (S11)   | Unclear             | Unclear                | Low                                   |             | Low                | Unclear                        | Low                         | Low                    |
| Keystone (S12)         | Unclear             | Unclear                | Low                                   |             | Low                | Unclear                        | Low                         | Low                    |
| A van de Putte (S13)   | High                | Unclear                | Low                                   |             | Low                | Unclear                        | Low                         | Low                    |
| Breedveld (S14)        | Unclear             | Unclear                | Low                                   |             | Low                | Low                            | Low                         | Low                    |
| Kim (S15)              | Unclear             | Unclear                | Low                                   |             | Low                | Unclear                        | Low                         | Unclear                |
| Miyasaka (S16)         | Unclear             | Unclear                | Low                                   |             | Low                | Unclear                        | Low                         | Low                    |
| Chen (S17)             | Unclear             | Unclear                | Low                                   |             | Low                | Unclear                        | Low                         | Low                    |
| Bejarano (S18)         | Low                 | Low                    | Low                                   |             | Low                | Unclear                        | Low                         | Low                    |
| Fleischman (S19)       | Unclear             | Unclear                | Low                                   |             | Low                | Unclear                        | Low                         | Unclear                |
| Huang (S20)            | Unclear             | Unclear                | Low                                   |             | Low                | Unclear                        | Low                         | Unclear                |
| Soubrier (S21)         | Unclear             | Unclear                | High                                  |             | Low                | Unclear                        | Low                         | Low                    |
| Detert (S22)           | Unclear             | Unclear                | Low                                   |             | Low                | Unclear                        | Low                         | Low                    |
| Takeuchi (S23)         | Unclear             | Unclear                | Low                                   |             | Low                | Low                            | Low                         | Low                    |
| Hørsløv-Petersen (S24) | Unclear             | Unclear                | Low                                   |             | Low                | Unclear                        | Low                         | Low                    |
| Vollenhoven (S25)      | Low                 | Low                    | Low                                   |             | Low                | Unclear                        | Low                         | Low                    |
| Smolen (S26)           | Low                 | Low                    | Low                                   |             | Low                | Unclear                        | Unclear                     | Low                    |
| <b>Etanercept</b>      |                     |                        |                                       |             |                    |                                |                             |                        |
| Moreland (S47)         | Unclear             | Low                    | Low                                   |             | Low                | Unclear                        | Low                         | Low                    |
| Genovese (S43)         | Unclear             | Unclear                | Low                                   |             | Low                | Low                            | Low                         | Low                    |
| Keystone               | Unclear             | Unclear                | Low                                   |             | Low                | Unclear                        | Low                         | Low                    |

Online supplement to: The Risk of Tuberculosis in Patients with Rheumatoid Arthritis Treated with Tumor Necrosis Factor- $\alpha$  Antagonist: A Metaanalysis of Both Randomized Controlled Trials and Registry/Cohort Studies. *The Journal of Rheumatology*. doi:10.3899/jrheum.150057 (S49)

|                       |         |         |         |         |         |         |         |
|-----------------------|---------|---------|---------|---------|---------|---------|---------|
| Van der Heijide(S48)  | Unclear | Unclear | Low     | Low     | Unclear | Low     | Low     |
| Combe(S41)            | Unclear | Unclear | Low     | Low     | Unclear | Low     | Low     |
| Emery (S42)           | Low     | Low     | Low     | Low     | Unclear | Low     | Low     |
| Kim (S45)             | Low     | Low     | High    | Low     | Unclear | Unclear | High    |
| Klareskog (S46)       | Low     | Low     | Low     | Low     | Unclear | Low     | Low     |
| Iannone (S44)         | High    | Low     | High    | Low     | Unclear | Low     | High    |
| <hr/>                 |         |         |         |         |         |         |         |
| Infliximab            |         |         |         |         |         |         |         |
| Maini (S1)            | Low     | Low     | Low     | Low     | Unclear | Low     | Low     |
| Goekoop-Ruiterman(S2) | Low     | Low     | Unclear | Low     | Low     | Low     | Unclear |
| St.Clair (S5)         | Low     | Unclear | Unclear | Low     | Unclear | Low     | High    |
| Quinn (S3)            | Unclear | Unclear | Low     | Unclear | Low     | Low     | Low     |
| Westhovens (S50)      | Unclear | Unclear | Low     | Low     | Unclear | Low     | Low     |
| Schiff (S4)           | Unclear | Unclear | Low     | Low     | Unclear | Low     | Low     |
| Vollenhoven (S6)      | Low     | Unclear | Low     | Low     | Unclear | Low     | Low     |
| Leirisalo-Repo (S7)   | Low     | Unclear | High    | Low     | Unclear | Low     | Low     |
| Rantalaiho (S8)       | Unclear | Unclear | Low     | Low     | Unclear | Low     | Low     |
| <hr/>                 |         |         |         |         |         |         |         |
| Golimumab             |         |         |         |         |         |         |         |
| Kay (S28)             | Unclear | Unclear | Low     | Low     | Low     | Low     | High    |
| Keystone (S27)        | Low     | Low     | Low     | Unclear | Unclear | Low     | Low     |
| Kremer (S29)          | Unclear | Unclear | Low     | Low     | Low     | Low     | Low     |
| Tanaka (S30)          | Unclear | Unclear | Low     | Low     | Unclear | Low     | Low     |
| Weinblatt (S31)       | Low     | Low     | Low     | Low     | Unclear | Low     | Unclear |
| Takeuchi (S32)        | Unclear | Unclear | Low     | Low     | Unclear | Low     | Low     |
| Smolen (S33)          | Unclear | Unclear | Low     | Low     | Low     | Low     | High    |
| Emery (S34)           | Low     | Low     | Low     | Low     | Unclear | Low     | Low     |
| <hr/>                 |         |         |         |         |         |         |         |
| Certolizumab Pegol    |         |         |         |         |         |         |         |
| Keystone (S36)        | Unclear | Unclear | Low     | Low     | Unclear | Low     | Low     |

Online supplement to: The Risk of Tuberculosis in Patients with Rheumatoid Arthritis Treated with Tumor Necrosis Factor- $\alpha$  Antagonist: A Metaanalysis of Both Randomized Controlled Trials and Registry/Cohort Studies. *The Journal of Rheumatology*. doi:10.3899/jrheum.150057

|                   |         |         |      |     |         |     |         |
|-------------------|---------|---------|------|-----|---------|-----|---------|
| Smolen (S37)      | Unclear | Unclear | Low  | Low | Unclear | Low | Unclear |
| Fleischmann (S35) | Low     | Low     | Low  | Low | Unclear | Low | High    |
| Weinblatt (S39)   | Low     | Low     | Low  | Low | Unclear | Low | Low     |
| Yamamoto (S38)    | Low     | Low     | Low  | Low | Unclear | Low | Low     |
| Smolen (S40)      | Low     | Unclear | High | Low | Unclear | Low | Low     |

\* In the dimension of other sources of bias, high risk is graded when the sponsors of the research evolved in the data collection of adverse events.

*Supplementary Table 5.* Percentage of the studies with LTBI screening and prophylaxis.

| Drugs              | LTBI patients included studies |                    | LTBI patients excluded studies (%) | Unclear(%) |
|--------------------|--------------------------------|--------------------|------------------------------------|------------|
|                    | Prophylaxis(%)                 | Non-prophylaxis(%) |                                    |            |
| Infliximab         | 1 (11.1%)                      | 5 (55.6%)          | 2 (22.2%)                          | 1 (11.1%)  |
| Etanercept         | 1 (11.1%)                      | 5 (55.6%)          | 2 (22.2%)                          | 1 (11.1%)  |
| Adalimumab         | 5 (27.8%)                      | 10 (55.6%)         | 2 (11.1%)                          | 1 (5.6%)   |
| Golimumab          | 7 (87.5%)                      | 0 (0%)             | 1 (12.5%)                          | 0 (0%)     |
| Certolizumab Pegol | 2 (33.3%)                      | 0 (0%)             | 4 (66.7%)                          | 0 (0%)     |

LTBI: latent tuberculosis infection.

*Supplementary Table 6.* Reported adjusted incidence rate/hazard ratios from non-RCTs

| Authors          | Year | RA/Biologic DMARDs vs. General population | RA /non Biologic DMARDs vs. General population | INF/ETA          | ADA/ETA            |
|------------------|------|-------------------------------------------|------------------------------------------------|------------------|--------------------|
| Asking (13)      | 2005 | N                                         | N                                              | N                | N                  |
| Wallis (14)      | 2004 | N                                         | N                                              | N                | N                  |
| Sichletidis (15) | 2006 | N                                         | N                                              | N                | N                  |
| Seong (16)       | 2007 | 30.1                                      | 8.9                                            | N                | N                  |
| Gomez-Reino (17) | 2007 | N                                         | N                                              | N                | N                  |
| Tubach (19)      | 2009 | 13.41                                     | N                                              | 10.3             | 16.28              |
| Dixon (18)       | 2009 | N                                         | N                                              | 3.1              | 4.2                |
| Tam (20)         | 2010 | 34.92                                     | 2.35                                           | N                | N                  |
| Winthrop (21)    | 2012 | N                                         | N                                              | N                | N                  |
| Atzni (22)       | 2012 | N                                         | N                                              | N                | N                  |
| Yoo (23)         | 2014 | N                                         | N                                              | N                | N                  |
| Arkema (24)      | 2014 | N                                         | N                                              | 2 (Hazard ratio) | 2.3 (Hazard ratio) |

RA: rheumatoid arthritis; DMARDs: disease modifying anti-rheumatic drugs; INF: infliximab; ADA: adalimumab; ETA: etanercept.

**References for 50 randomized controlled trials**

- Online supplement to: The Risk of Tuberculosis in Patients with Rheumatoid Arthritis Treated with Tumor Necrosis Factor- $\alpha$  Antagonist: A Metaanalysis of Both Randomized Controlled Trials and Registry/Cohort Studies. *The Journal of Rheumatology*. doi:10.3899/jrheum.150057
- S1. Maini R, St Clair EW, Breedveld F, Furst D, Kalden J, Weisman M, et al. Infliximab (chimeric anti-tumour necrosis factor alpha monoclonal antibody) versus placebo in rheumatoid arthritis patients receiving concomitant methotrexate: a randomised phase III trial. ATTRACT Study Group. *Lancet* 1999;354:1932-9.
  - S2. Goekoop-Ruiterman YP, de Vries-Bouwstra JK, Allaart CF, van Zeben D, Kerstens PJ, Hazes JM, et al. Clinical and radiographic outcomes of four different treatment strategies in patients with early rheumatoid arthritis (the BeSt study): a randomized, controlled trial. *Arthritis Rheum* 2005;52:3381-90.
  - S3. Quinn MA, Conaghan PG, O'Connor PJ, Karim Z, Greenstein A, Brown A, et al. Very early treatment with infliximab in addition to methotrexate in early, poor-prognosis rheumatoid arthritis reduces magnetic resonance imaging evidence of synovitis and damage, with sustained benefit after infliximab withdrawal: results from a twelve-month randomized, double-blind, placebo-controlled trial. *Arthritis Rheum* 2005;52:27-35.
  - S4. Schiff M, Keiserman M, Coddling C, Songcharoen S, Berman A, Nayiager S, et al. Efficacy and safety of abatacept or infliximab vs placebo in ATTEST: a phase III, multi-centre, randomised, double-blind, placebo-controlled study in patients with rheumatoid arthritis and an inadequate response to methotrexate. *Ann Rheum Dis* 2008;67:1096-103.
  - S5. St Clair EW, van der Heijde DM, Smolen JS, Maini RN, Bathon JM, Emery P, et al. Combination of infliximab and methotrexate therapy for early rheumatoid arthritis: a randomized, controlled trial. *Arthritis Rheum* 2004;50:3432-43.
  - S6. Vollenhoven RF, Ernestam S, Geborek P, Petersson IF, Coster L, Waltbrand E, et al. Addition of infliximab compared with addition of sulfasalazine and hydroxychloroquine to methotrexate in patients with early rheumatoid arthritis (Swefot trial): 1-year results of a randomised trial. *Lancet* 2009;374:459-66.
  - S7. Leirisalo-Repo M, Kautiainen H, Laasonen L, Korpela M, Kauppi MJ, Kaipiainen-Seppanen O, et al. Infliximab for 6 months added on combination therapy in early rheumatoid arthritis: 2-year results from an investigator-initiated, randomised, double-blind, placebo-controlled study (the NEO-RACo Study). *Ann Rheum Dis* 2013;72:851-7.
  - S8. Rantalaiho V, Kautiainen H, Korpela M, Hannonen P, Kaipiainen-Seppanen O, Mottonen T, et al. Targeted treatment with a combination of traditional DMARDs produces excellent clinical and radiographic long-term outcomes in early rheumatoid arthritis regardless of initial infliximab. The 5-year follow-up results of a randomised clinical trial, the NEO-RACo trial. *Ann Rheum Dis* 2014;73:1954-61.
  - S9. Weinblatt ME, Keystone EC, Furst DE, Moreland LW, Weisman MH, Birbara CA, et al. Adalimumab, a fully human anti-tumor necrosis factor alpha monoclonal antibody, for the treatment of rheumatoid arthritis in patients taking concomitant methotrexate: the ARMADA trial. *Arthritis Rheum* 2003;48:35-45.
  - S10. Furst DE, Schiff MH, Fleischmann RM, Strand V, Birbara CA, Compagnone D, et al. Adalimumab, a fully human anti tumor necrosis factor-alpha monoclonal antibody, and concomitant standard antirheumatic therapy for the treatment of rheumatoid arthritis: results of STAR (Safety Trial of Adalimumab in Rheumatoid Arthritis). *J Rheumatol* 2003;30:2563-71.
  - S11. A van de Putte LB, Atkins C, Malaise M, Sany J, Russell AS, van Riel PL, et al. Efficacy and safety of adalimumab as monotherapy in patients with rheumatoid arthritis for whom previous disease modifying antirheumatic drug treatment has failed. *Ann Rheum Dis* 2004;63:508-16.

- Online supplement to: The Risk of Tuberculosis in Patients with Rheumatoid Arthritis Treated with Tumor Necrosis Factor- $\alpha$  Antagonist: A Metaanalysis of Both Randomized Controlled Trials and Registry/Cohort Studies. *The Journal of Rheumatology*. doi:10.3899/jrheum.150057
- S12. Keystone EC, Kavanaugh AF, Sharp JT, Tannenbaum H, Hua Y, Teoh LS, et al. Radiographic, clinical, and functional outcomes of treatment with adalimumab (a Human Anti-Tumor Necrosis Factor monoclonal Antibody) in patients with active rheumatoid arthritis receiving concomitant methotrexate therapy: A randomized, placebo-controlled, 52-week trial. *Arthritis Rheum* 2004;50:1400-1411.
- S13. A van de Putte LB, Rau R, Breedveld FC, Kalden JR, Malaise MG, M van Riel PLCM, et al. Efficacy and safety of the fully human anti-tumour necrosis factor  $\alpha$  monoclonal antibody adalimumab (D2E7) in DMARD refractory patients with rheumatoid arthritis: a 12 week, phase II study. *Ann Rheum Dis* 2003;62:1168-1177.
- S14. Breedveld FC, Weisman MH, Kavanaugh AF, Cohen SB, Pavelka K, van Vollenhoven R, et al. The PREMIER study: A multicenter, randomized, double-blind clinical trial of combination therapy with adalimumab plus methotrexate versus methotrexate alone or adalimumab alone in patients with early, aggressive rheumatoid arthritis who had not had previous methotrexate treatment. *Arthritis Rheum* 2006;54:26-37.
- S15. Kim Ho-Youn LS-K, Song Yeong-Wook, Yoo Dae-Hyun, KOH Eun-Mi, Yoo Bin, Luo-Allison. A randomized, double-blind, placebo-controlled, phase III study of the human anti-tumor necrosis factor antibody adalimumab administered as subcutaneous injections in Korean rheumatoid arthritis patients treated with methotrexate. *APLAR journal of rheumatology* 2007;10:9-16.
- S16. Miyasaka N, Investigators CS. Clinical investigation in highly disease-affected rheumatoid arthritis patients in Japan with adalimumab applying standard and general evaluation: the CHANGE study. *Mod Rheumatol* 2008;18:252-62.
- S17. Chen DY, Chou SJ, Hsieh TY, Chen YH, Chen HH, Hsieh CW, et al. Randomized, double-blind, placebo-controlled, comparative study of human anti-TNF antibody adalimumab in combination with methotrexate and methotrexate alone in Taiwanese patients with active rheumatoid arthritis. *J Formos Med Assoc* 2009;108:310-9.
- S18. Bejarano V, Quinn M, Conaghan PG, Reece R, Keenan AM, Walker D, et al. Effect of the early use of the anti-tumor necrosis factor adalimumab on the prevention of job loss in patients with early rheumatoid arthritis. *Arthritis Rheum* 2008;59:1467-74.
- S19. Fleischmann R, Cutolo M, Genovese MC, Lee EB, Kanik KS, Sadis S, et al. Phase IIb dose-ranging study of the oral JAK inhibitor tofacitinib (CP-690,550) or adalimumab monotherapy versus placebo in patients with active rheumatoid arthritis with an inadequate response to disease-modifying antirheumatic drugs. *Arthritis Rheum* 2012;64:617-29.
- S20. Huang F, Zhang FC, Bao CD, Tao Y, Gu JR, Xu JH, et al. [Adalimumab plus methotrexate for the treatment of rheumatoid arthritis: a multi-center randomized, double-blind, placebo-controlled clinical study.]. *Zhonghua Nei Ke Za Zhi* 2009;48:916-21.
- S21. Soubrier M, Puechal X, Sibilia J, Mariette X, Meyer O, Combe B, et al. Evaluation of two strategies (initial methotrexate monotherapy vs its combination with adalimumab) in management of early active rheumatoid arthritis: data from the GUEPARD trial. *Rheumatology (Oxford)* 2009;48:1429-34.
- S22. Detert J, Bastian H, Listing J, Weiss A, Wassenberg S, Liebhaber A, et al. Induction therapy with adalimumab plus methotrexate for 24 weeks followed by methotrexate monotherapy up to week 48 versus methotrexate therapy alone for DMARD-naive patients with early rheumatoid arthritis: HIT HARD, an investigator-initiated study. *Ann Rheum Dis* 2013;72:844-50.
- S23. Takeuchi T, Yamanaka H, Ishiguro N, Miyasaka N, Mukai M, Matsubara T, et al. Adalimumab,

Online supplement to: The Risk of Tuberculosis in Patients with Rheumatoid Arthritis Treated with Tumor Necrosis Factor- $\alpha$  Antagonist: A Metaanalysis of Both Randomized Controlled Trials and Registry/Cohort Studies. *The Journal of Rheumatology*. doi:10.3899/jrheum.150057 a human anti-TNF monoclonal antibody, outcome study for the prevention of joint damage in Japanese patients with early rheumatoid arthritis: the HOPEFUL 1 study. *Ann Rheum Dis* 2014;73:536-43.

S24. Hørslev-Petersen K, Hetland ML, Junker P, Podenphant J, Ellingsen T, Ahlquist P, et al. Adalimumab added to a treat-to-target strategy with methotrexate and intra-articular triamcinolone in early rheumatoid arthritis increased remission rates, function and quality of life. The OPERA Study: an investigator-initiated, randomised, double-blind, parallel-group, placebo-controlled trial. *Ann Rheum Dis* 2014;73:654-61.

S25. Vollenhoven RF, Fleischmann R, Cohen S, Lee EB, Garcia Mejjide JA, Wagner S, et al. Tofacitinib or adalimumab versus placebo in rheumatoid arthritis. *N Engl J Med* 2012;367:508-19.

S26. Smolen JS, Emery P, Fleischmann R, van Vollenhoven RF, Pavelka K, Durez P, et al. Adjustment of therapy in rheumatoid arthritis on the basis of achievement of stable low disease activity with adalimumab plus methotrexate or methotrexate alone: the randomised controlled OPTIMA trial. *Lancet* 2014;383:321-32.

S27. Keystone EC, Genovese MC, Klareskog L, Hsia EC, Hall ST, Miranda PC, et al. Golimumab, a human antibody to tumour necrosis factor {alpha} given by monthly subcutaneous injections, in active rheumatoid arthritis despite methotrexate therapy: the GO-FORWARD Study. *Ann Rheum Dis* 2009;68:789-96.

S28. Kay J, Matteson EL, Dasgupta B, Nash P, Durez P, Hall S, et al. Golimumab in patients with active rheumatoid arthritis despite treatment with methotrexate: a randomized, double-blind, placebo-controlled, dose-ranging study. *Arthritis Rheum* 2008;58:964-75.

S29. Kremer J, Ritchlin C, Mendelsohn A, Baker D, Kim L, Xu Z, et al. Golimumab, a new human anti-tumor necrosis factor alpha antibody, administered intravenously in patients with active rheumatoid arthritis: Forty-eight-week efficacy and safety results of a phase III randomized, double-blind, placebo-controlled study. *Arthritis Rheum* 2010;62:917-28.

S30. Tanaka Y, Harigai M, Takeuchi T, Yamanaka H, Ishiguro N, Yamamoto K, et al. Golimumab in combination with methotrexate in Japanese patients with active rheumatoid arthritis: results of the GO-FORTH study. *Ann Rheum Dis* 2012;71:817-24.

S31. Weinblatt ME, Bingham CO, 3rd, Mendelsohn AM, Kim L, Mack M, Lu J, et al. Intravenous golimumab is effective in patients with active rheumatoid arthritis despite methotrexate therapy with responses as early as week 2: results of the phase 3, randomised, multicentre, double-blind, placebo-controlled GO-FURTHER trial. *Ann Rheum Dis* 2013;72:381-9.

S32. Takeuchi T, Harigai M, Tanaka Y, Yamanaka H, Ishiguro N, Yamamoto K, et al. Golimumab monotherapy in Japanese patients with active rheumatoid arthritis despite prior treatment with disease-modifying antirheumatic drugs: results of the phase 2/3, multicentre, randomised, double-blind, placebo-controlled GO-MONO study through 24 weeks. *Ann Rheum Dis* 2013;72:1488-95.

S33. Smolen JS, Kay J, Landewe RB, Matteson EL, Gaylis N, Wollenhaupt J, et al. Golimumab in patients with active rheumatoid arthritis who have previous experience with tumour necrosis factor inhibitors: results of a long-term extension of the randomised, double-blind, placebo-controlled GO-AFTER study through week 160. *Ann Rheum Dis* 2012;71:1671-9.

S34. Emery P, Fleischmann RM, Doyle MK, Strusberg I, Durez P, Nash P, et al. Golimumab, a human anti-tumor necrosis factor monoclonal antibody, injected subcutaneously every 4 weeks

Online supplement to: The Risk of Tuberculosis in Patients with Rheumatoid Arthritis Treated with Tumor Necrosis Factor- $\alpha$  Antagonist: A Metaanalysis of Both Randomized Controlled Trials and Registry/Cohort Studies. *The Journal of Rheumatology*. doi:10.3899/jrheum.150057 in patients with active rheumatoid arthritis who had never taken methotrexate: 1-year and 2-year clinical, radiologic, and physical function findings of a phase III, multicenter, randomized, double-blind, placebo-controlled study. *Arthritis Care Res (Hoboken)* 2013;65:1732-42.

S35. Fleischmann R, Vencovsky J, van Vollenhoven RF, Borenstein D, Box J, Coteur G, et al. Efficacy and safety of certolizumab pegol monotherapy every 4 weeks in patients with rheumatoid arthritis failing previous disease-modifying antirheumatic therapy: the FAST4WARD study. *Ann Rheum Dis* 2009;68:805-11.

S36. Keystone E, Heijde D, Mason D, Jr., Landewe R, Vollenhoven RV, Combe B, et al. Certolizumab pegol plus methotrexate is significantly more effective than placebo plus methotrexate in active rheumatoid arthritis: findings of a fifty-two-week, phase III, multicenter, randomized, double-blind, placebo-controlled, parallel-group study. *Arthritis Rheum* 2008;58:3319-29.

S37. Smolen JS, Emery P, Ferraccioli GF, Samborski W, Berenbaum F, Davies OR, et al. Certolizumab pegol in rheumatoid arthritis patients with low to moderate activity: the CERTAIN double-blind, randomised, placebo-controlled trial. *Ann Rheum Dis* 2014.

S38. Yamamoto K, Takeuchi T, Yamanaka H, Ishiguro N, Tanaka Y, Eguchi K, et al. Efficacy and safety of certolizumab pegol plus methotrexate in Japanese rheumatoid arthritis patients with an inadequate response to methotrexate: the J-RAPID randomized, placebo-controlled trial. *Mod Rheumatol* 2014;24:715-24.

S39. Weinblatt ME, Fleischmann R, Huizinga TW, Emery P, Pope J, Massarotti EM, et al. Efficacy and safety of certolizumab pegol in a broad population of patients with active rheumatoid arthritis: results from the REALISTIC phase IIIb study. *Rheumatology (Oxford)* 2012;51:2204-14.

S40. Smolen J, Landewe RB, Mease P, Brzezicki J, Mason D, Luijckens K, et al. Efficacy and safety of certolizumab pegol plus methotrexate in active rheumatoid arthritis: the RAPID 2 study. A randomised controlled trial. *Ann Rheum Dis* 2009;68:797-804.

S41. Combe B, Codreanu C, Fiocco U, Gaubitz M, Geusens PP, Kvien TK, et al. Etanercept and sulfasalazine, alone and combined, in patients with active rheumatoid arthritis despite receiving sulfasalazine: a double-blind comparison. *Ann Rheum Dis* 2006;65:1357-62.

S42. Emery P, Breedveld F, van der Heijde D, Ferraccioli G, Dougados M, Robertson D, et al. Two-year clinical and radiographic results with combination etanercept-methotrexate therapy versus monotherapy in early rheumatoid arthritis: a two-year, double-blind, randomized study. *Arthritis Rheum* 2010;62:674-82.

S43. Genovese MC, Bathon JM, Martin RW, Fleischmann RM, Tesser JR, Schiff MH, et al. Etanercept versus methotrexate in patients with early rheumatoid arthritis: two-year radiographic and clinical outcomes. *Arthritis Rheum* 2002;46:1443-50.

S44. Iannone F, La Montagna G, Bagnato G, Gremese E, Giardina A, Lapadula G. Safety of etanercept and methotrexate in patients with rheumatoid arthritis and hepatitis C virus infection: a multicenter randomized clinical trial. *J Rheumatol* 2014;41:286-92.

S45. Kim HY, Hsu PN, Barba M, Sulaiman W, Robertson D, Vlahos B, et al. Randomized comparison of etanercept with usual therapy in an Asian population with active rheumatoid arthritis: the APPEAL trial. *Int J Rheum Dis* 2012;15:188-96.

S46. Klareskog L, van der Heijde D, de Jager JP, Gough A, Kalden J, Malaise M, et al. Therapeutic effect of the combination of etanercept and methotrexate compared with each treatment alone in patients with rheumatoid arthritis: double-blind randomised controlled trial. *Lancet*



Online supplement to: The Risk of Tuberculosis in Patients with Rheumatoid Arthritis Treated with Tumor Necrosis Factor- $\alpha$  Antagonist: A Metaanalysis of Both Randomized Controlled Trials and Registry/Cohort Studies. *The Journal of Rheumatology*. doi:10.3899/jrheum.150057 2004;363:675-81.

S47. Moreland LW, O'Dell JR, Paulus HE, Curtis JR, Bathon JM, St Clair EW, et al. A randomized comparative effectiveness study of oral triple therapy versus etanercept plus methotrexate in early aggressive rheumatoid arthritis: the treatment of Early Aggressive Rheumatoid Arthritis Trial. *Arthritis Rheum* 2012;64:2824-35.

S48. van der Heijde D, Klareskog L, Rodriguez-Valverde V, Codreanu C, Bolosiu H, Melo-Gomes J, et al. Comparison of etanercept and methotrexate, alone and combined, in the treatment of rheumatoid arthritis: two-year clinical and radiographic results from the TEMPO study, a double-blind, randomized trial. *Arthritis Rheum* 2006;54:1063-74.

S49. Keystone EC, Schiff MH, Kremer JM, Kafka S, Lovy M, DeVries T, et al. Once-weekly administration of 50 mg etanercept in patients with active rheumatoid arthritis: results of a multicenter, randomized, double-blind, placebo-controlled trial. *Arthritis Rheum* 2004;50:353-63.

S50. Westhovens R, Yocum D, Han J, Berman A, Strusberg I, Geusens P, et al. The safety of infliximab, combined with background treatments, among patients with rheumatoid arthritis and various comorbidities: a large, randomized, placebo-controlled trial. *Arthritis Rheum* 2006;54:1075-86.
